# Supplementary material for: Expression profiles of sugarcane under drought conditions: Variation in gene regulation
Source: PubMed Central journal article supplement (PMC4763319; doi:10.1590/s1415-475738420140288), 2015
Supplement: 1415-4757-gmb-S1415-475738420140288-s001.pdf [file 1415-4757-gmb-S1415-475738420140288-s001.pdf]

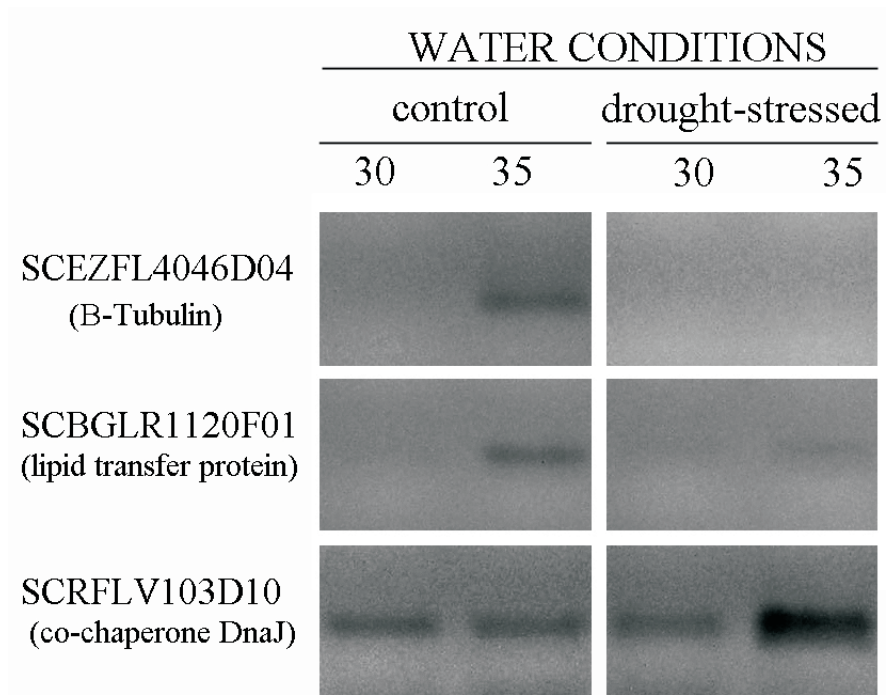

**Figure S1** - Differential gene expression analyzed by RT-PCR in the sugarcane genotype RB72910 under simulated drought stress. Three genes ( $\beta$ -tubulin, LTP and DnaJ) were amplified by PCR with 30 and 35 cycles and the amplification products were electrophoresed on 3% (w/v) agarose gels.
