# Supplementary material for: Expression profiles of sugarcane under drought conditions: Variation in gene regulation
Source: PubMed Central journal article supplement (PMC4763319; doi:10.1590/s1415-475738420140288), 2015
Supplement: 1415-4757-gmb-S1415-475738420140288-s002.pdf [file 1415-4757-gmb-S1415-475738420140288-s002.pdf]

**Table S1** - Analysis of variance and coefficient of variance for the physiological traits SPAD index, Fv/Fm ratio, net photosynthesis (A), stomatal transpiration (E) and stomatal conductance (gs).

| Source of variance | df | Mean Sq    |        |        |       |        |
|--------------------|----|------------|--------|--------|-------|--------|
|                    |    | SPAD index | Fv/Fm  | A      | E     | gs     |
| Treatments         | 1  | 2.7        | 0.0016 | 220.9* | 7.38* | 0.026* |
| Days               | 1  | 75.7       | 0.0009 | 0.51   | 0.01  | 0.001  |
| Treatments x Days  | 1  | 3.4        | 0.0006 | 0.0008 | 0.01  | 0.002  |
| Residuals          | 12 | 31.2       | 0.0004 | 4      | 0.14  | 0.008  |
| CV%                | -  | 15         | 2.6    | 27     | 26    | 43     |

\*p<0.05
